# Supplementary material
Source: publisher site journal article supplement (https://www.dovepress.com/article/605013)
Supplement: Supplementary file 1 [file 605013%20Revised%20Supplementary%20Materials.doc]

**Supplementary Table S1. Antimicrobial Susceptibility Rates of Major Gram‑Positive Cocci [% (n/N)]**

| Antibiotic | *S. aureus* (n=45) | CoNS (n=11) | | *Streptococcus spp.* (n=14) | | *Enterococcus spp. (n=7*) | |  |
| --- | --- | --- | --- | --- | --- | --- | --- | --- |
| Penicillin G | 4.44(2/45) | | 0 | | 92.86(13/14) | | 42.86(3/7) | |
| Vancomycin | 100(45/45) | | 100(11/11) | | 100(14/14) | | 100(7/7) | |
| Teicoplanin | 100(45/45) | | 100(11/11) | | - | | 85.71（6/7） | |
| Rifampicin | 97.78(44/45) | | 100(11/11) | | - | | 28.57（2/7） | |
| Chloramphenicol | 95.56(43/45) | | 100(11/11) | | 92.86(13/14) | | 71.43（5/7） | |
| Tetracycline | 80.00(36/45) | | 90.91(10/11) | | 64.29(9/14) | | 14.29（1/7） | |
| Ciprofloxacin | 88.89(40/45) | | 81.82(9/11) | | - | | 42.86(3/7) | |
| Levofloxacin | 91.11(41/45) | | 81.82(9/11) | | 78.57(11/14) | | 42.86(3/7) | |
| Clindamycin | 28.89(13/45) | | 36.36(4/11) | | 28.57(4/14) | | - | |
| Erythromycin | 26.67(12/45) | | 27.27(3/11) | | 28.57(4/14) | | - | |
| Doxycycline | 95.56(43/45) | | 100(11/11) | | - | | - | |
| Oxacillin | 75.56(34/45) | | 100(11/11) | | - | | - | |
| Gentamicin | 93.33(42/45) | | 63.63(7/11) | | - | | - | |
| Minocycline | 97.78(44/45) | | 100(11/11) | | - | | - | |
| Trimethoprim/sulfamethoxazole | 73.33(33/45) | | 72.73(8/11) | | - | | - | |
| Linezolid | 100(45/45) | | 100(11/11) | | 100(14/14) | | - | |

*Note: CoNS = coagulase‑negative staphylococci; “–” indicates not tested.*

**Supplementary Table S2. Antimicrobial Susceptibility Rates of Major Gram‑Negative Bacilli [% (n/N)]**

| Antibiotic | E. coli (26 isolates) | P. aeruginosa (14 isolates) | Proteus spp. (13 isolates) | E. cloacae (13 isolates) |
| --- | --- | --- | --- | --- |
| Piperacillin/Tazobactam | 96.15（25/26） | 100（14/14） | 100（13/13） | 69.23 (9/13) |
| Imipenem | 100（26/26） | 92.86（13/14） | - | 92.31 (12/13) |
| Meropenem | 100（26/26） | 92.86（13/14） | 100（13/13） | 92.31(12/13) |
| Cefepime | 65.38（17/26） | 92.86（13/14） | 100（13/13） | 38.46（5/13） |
| Amikacin | 96.15（25/26） | 100(14/14) | 100（13/13） | 100（13/13） |
| Tobramycin | 65.38（17/26） | 92.86（13/14） | 76.92 (10/13) | 69.23 (9/13) |
| Gentamicin | 73.08（19/26） | 100（14/14） | 76.92 (10/13) | 69.23 (9/13) |
| Ciprofloxacin | 38.46（10/26） | 100（14/14） | 69.23 (9/13) | 69.23 (9/13) |
| Levofloxacin | 42.31（11/26） | 100（14/14） | 69.23 (9/13) | 69.23 (9/13) |
| Ceftazidime | 53.85（14/26） | 100（14/14） | 92.31 (12/13) | 61.54（8/13） |
| Aztreonam | 53.85（14/26） | 85.71 (12/14) | 92.31 (12/13) | 53.85（7/13） |
| Ceftriaxone | 42.31（11/26） | - | 92.31 (12/13) | 53.85（7/13） |
| Cefoxitin | 76.92（20/26） | - | 92.31 (12/13) | - |
| Ampicillin/sulbactam | 53.85（14/26） | - | 76.92 (10/13) | - |
| Cefazolin | 30.77（8/26） | - | 7.69（1/13） | - |
| Cefuroxime | 34.62（9/26） | - | 46.15（6/13） | - |
| Trimethoprim/sulfamethoxazole | 42.31（11/26） | - | 61.54（8/13） | 61.54（8/13） |
| Amoxicillin/clavulanate | 50.00 (13/26) | - | 69.23 (9/13) | - |
| Ampicillin | 11.54 (3/26) | - | 23.08（3/13） | - |

*Note: “–” indicates not tested.*
